# Supplementary material for: Peroxiredoxin 5 Acts as a Negative Regulator of the Sodium-Chloride Cotransporter Involved in Alleviating Angiotensin II-Induced Hypertension
Source: MDPI journal article supplement (doi:10.3390/antiox14010100), 2025-01-16
Supplement: s1 [file s1]

Supplementary Materials

**Peroxiredoxin 5 acts as a negative regulator of the sodium chloride cotransporter involved in alleviating angiotensin II-induced hypertension**

Hoon-In Choi<sup>1</sup>, In Ae Jung<sup>1</sup>, and Soo Wan Kim<sup>1\*</sup>

<sup>1</sup> Department of Internal Medicine, Chonnam National University Medical School & Hospital, Gwangju 61469, Korea; skimw@chonnam.ac.kr

\*Correspondence: skimw@chonnam.ac.kr; Tel.: +82 62 220 6271

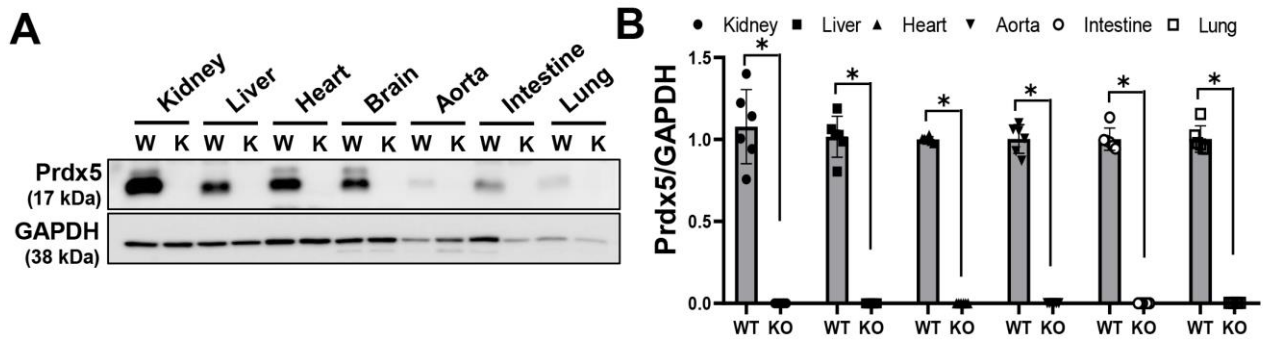

**Figure S1.** Expression level of Prdx5 in various tissues of Prdx5 KO mice. In WT mice and Prdx5 KO mice, the protein level (A) and mRNA level (B) of Prdx5 was confirmed by western blotting and real-time PCR in the kidney, liver, heart, brain, aorta, intestine, and lung tissues. GAPDH was used as an internal control. For bar graphs, the value of the WT\_Saline group was set to one and expressed as a fold change. All values are presented as the mean  $\pm$  SD. Statistical significance was measured using Mann-Whitney test. \* $p < 0.05$ , compared with the saline-infused Prdx5 WT. \*\* $p < 0.05$ , compared with Ang II-infused Prdx5 WT.

**Table S1.** Mouse qPCR primer sequences

| Gene                          | RefSeq accession number | Forward primer                      | Reverse primer                          |
|-------------------------------|-------------------------|-------------------------------------|-----------------------------------------|
| <i>Prdx5</i>                  | NM_012021               | 5'-<br>TTATTGGATGATTCTTTGGTC<br>-3' | 5'-<br>CCTTCACTATGCCGTTGTCTA<br>TCAC-3' |
| $\alpha$ -SMA                 | NM_007392.3             | 5'-<br>CTGACAGAGGCACCACTGA<br>A-3'  | 5'-<br>AGAGGCATAGAGGGACAGCA<br>-3'      |
| <i>Vimentin</i>               | NM_011701.4             | SinoBiological, Cat # MP200442      |                                         |
| <i>Fibronectin</i>            | NM_010233               | 5'-<br>ACAGAGCTCAACCTCCCTG<br>A-3'  | 5'-<br>TGTGCTCTCCTGGTTCTCCT-<br>3'      |
| <i>CTGF</i>                   | NM_010217.2             | 5'-<br>CACAGAGTGGAGCGCCTGT<br>TC-3' | 5'-<br>GATGCACTTTTTGCCCTTCTT<br>AATG-3' |
| <i>TGF-<math>\beta</math></i> | NM_011577.2             | 5'-<br>CAGGAGCGCACAATCATGTT<br>-3'  | 5'-<br>CTTTAGGAAGGACCTGGGTT-<br>3'      |
| <i>GAPDH</i>                  | NM_001289726            | 5'-<br>TGTGTCCTCGTGGATCTGA-<br>3'   | 5'-<br>GATGCCTGCTTCACCACCTT-<br>3'      |
